# Supplementary material for: Structural basis for ion selectivity in potassium-selective channelrhodopsins
Source: PubMed Central journal article supplement (PMC7615185; doi:10.1016/j.cell.2023.08.009), 2023-08-30

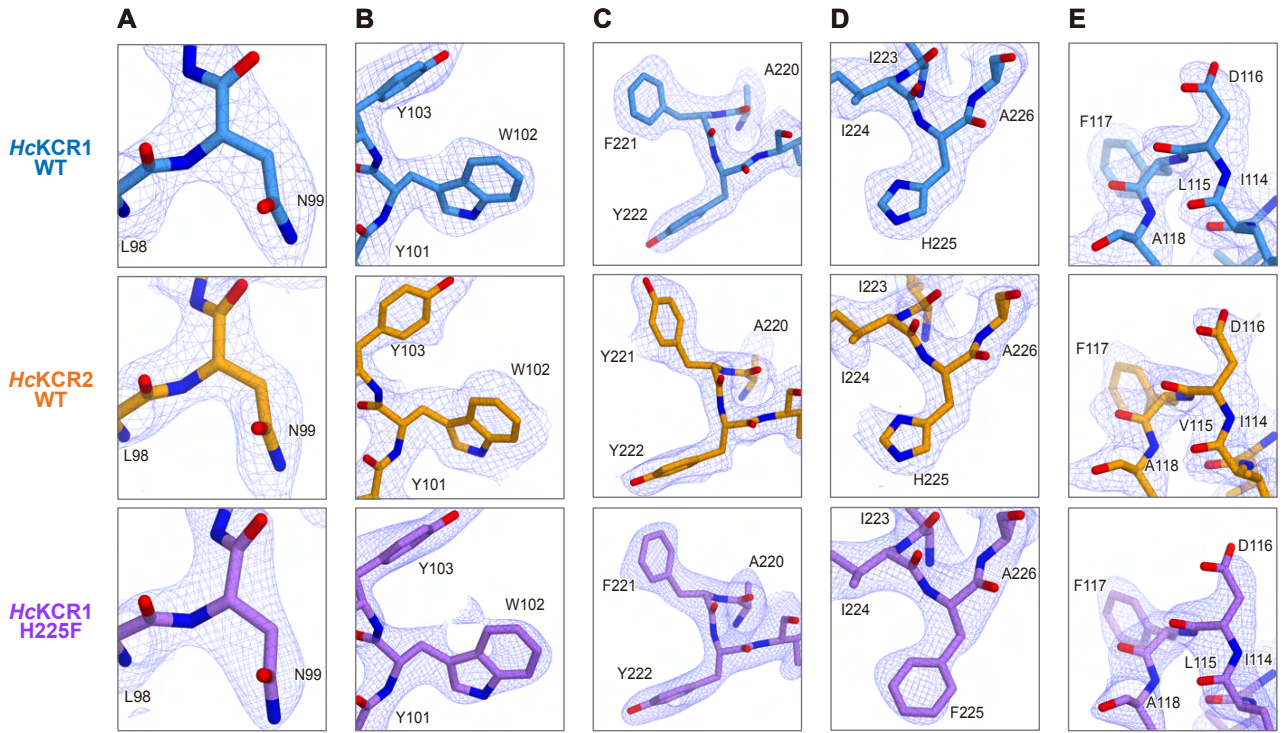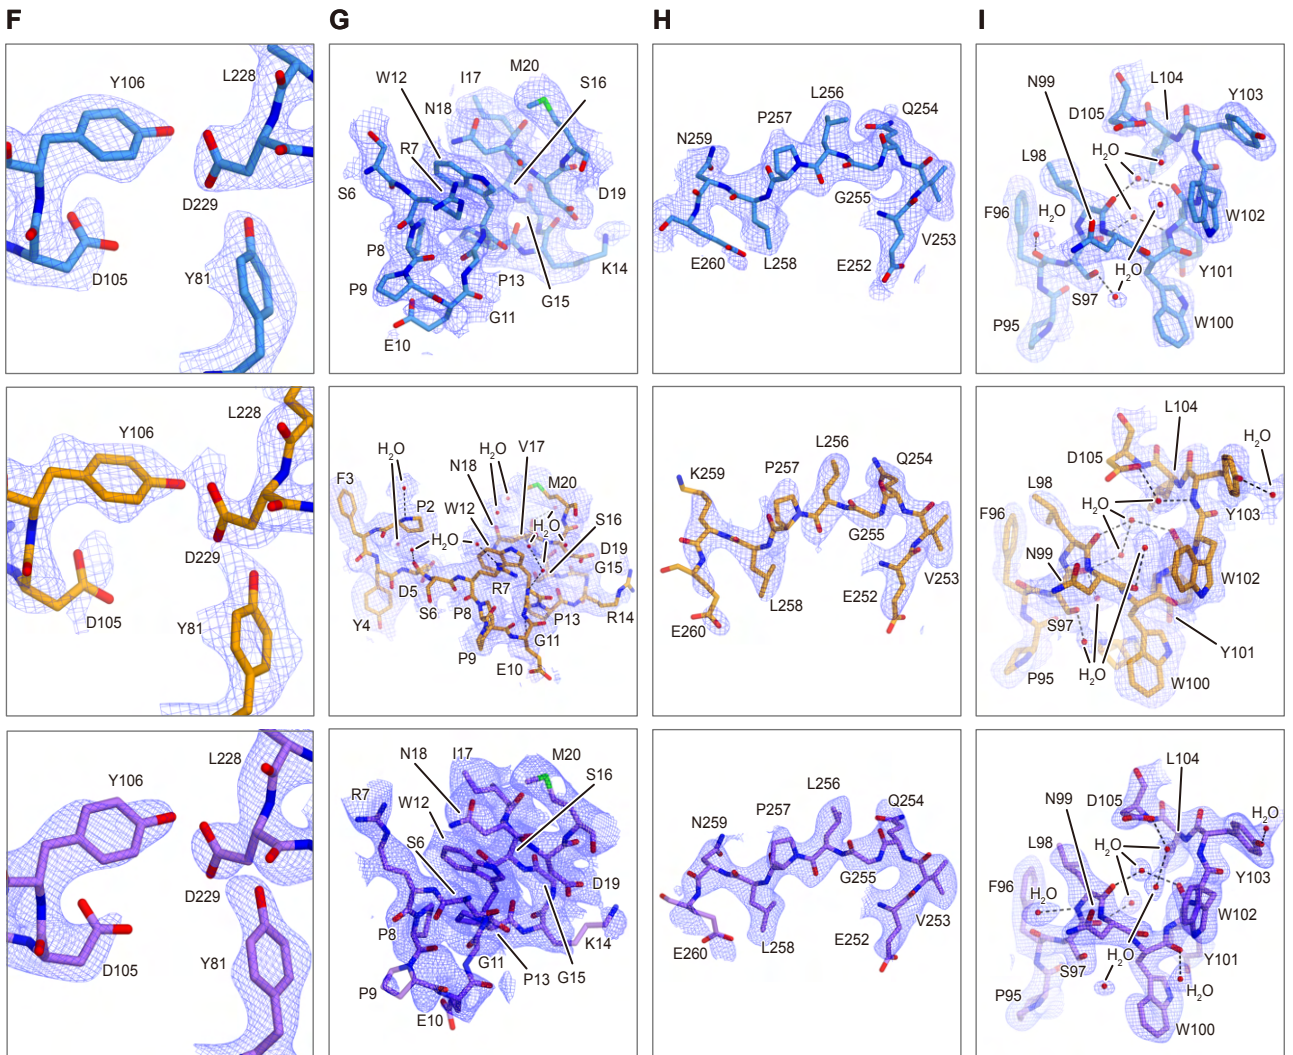

Supplement: EMS189037-supplement-Data_S1.pdf [file EMS189037-supplement-Data_S1.pdf]
