# Supplementary material for: Structural basis for ion selectivity in potassium-selective channelrhodopsins
Source: PubMed Central journal article supplement (PMC7615185; doi:10.1016/j.cell.2023.08.009), 2023-08-30
Supplement: EMS189037-supplement-Document_S1_Table_S1.pdf [file EMS189037-supplement-Document_S1_Table_S1.pdf]

## **Supplemental information**

### **Structural basis for ion selectivity in potassium-selective channelrhodopsins**

**Seiya Tajima, Yoon Seok Kim, Masahiro Fukuda, YoungJu Jo, Peter Y. Wang, Joseph M. Paggi, Masatoshi Inoue, Eamon F.X. Byrne, Koichiro E. Kishi, Seiwa Nakamura, Charu Ramakrishnan, Shunki Takaramoto, Takashi Nagata, Masae Konno, Masahiro Sugiura, Kota Katayama, Toshiki E. Matsui, Keitaro Yamashita, Suhyang Kim, Hisako Ikeda, Jaeah Kim, Hideki Kandori, Ron O. Dror, Keiichi Inoue, Karl Deisseroth, and Hideaki E. Kato**

**Table S1. Cryo-EM data collection, refinement and validation statistics, related to STAR Methods**

|                                                    | <i>HcKCR1</i> WT<br>(EMD-34530)<br>(PDB 8H86) | <i>HcKCR2</i> WT<br>(EMD-34531)<br>(PDB 8H87) | <i>HcKCR1</i> H225F<br>(EMD-35713)<br>(PDB 8IU0) |
|----------------------------------------------------|-----------------------------------------------|-----------------------------------------------|--------------------------------------------------|
| <b>Data collection and processing</b>              |                                               |                                               |                                                  |
| Magnification                                      | 105,000                                       | 105,000                                       | 105,000                                          |
| Voltage (kV)                                       | 300                                           | 300                                           | 300                                              |
| Electron exposure (e-/Å <sup>2</sup> )             | 48                                            | 51                                            | 48                                               |
| Defocus range (µm)                                 | -0.8 ~ -1.6                                   | -0.6 ~ -1.6                                   | -0.8 ~ -1.6                                      |
| Pixel size (Å)                                     | 0.83                                          | 0.83                                          | 0.83                                             |
| Symmetry imposed                                   | C3                                            | C3                                            | C3                                               |
| Final particle images (no.)                        | 801,114                                       | 682,797                                       | 180,294                                          |
| Map resolution (Å)                                 | 2.56                                          | 2.53                                          | 2.66                                             |
| FSC threshold                                      | 0.143                                         | 0.143                                         | 0.143                                            |
| <b>Refinement</b>                                  |                                               |                                               |                                                  |
| Initial model used (PDB code)                      | AF2 model                                     | AF2 model                                     | 8H86                                             |
| Map sharpening <i>B</i> factor (Å <sup>2</sup> )   | -125.8                                        | -90.5                                         | -101.3                                           |
| Model composition<br>(Number of atoms per monomer) |                                               |                                               |                                                  |
| Non-hydrogen atoms                                 | 2360                                          | 2361                                          | 2354                                             |
| Protein residues                                   | 2090                                          | 2097                                          | 2102                                             |
| Retinal                                            | 20                                            | 20                                            | 20                                               |
| Lipids                                             | 229                                           | 195                                           | 206                                              |
| Water                                              | 21                                            | 49                                            | 26                                               |
| <i>B</i> factors (Å <sup>2</sup> )                 |                                               |                                               |                                                  |
| Protein                                            | 100.9                                         | 48.0                                          | 70.5                                             |
| Retinal                                            | 89.1                                          | 53.9                                          | 69.7                                             |
| Lipids                                             | 138.7                                         | 85.6                                          | 109.4                                            |
| Water                                              | 92.2                                          | 53.9                                          | 66.9                                             |
| R.m.s. deviations                                  |                                               |                                               |                                                  |
| Bond lengths (Å)                                   | 0.009                                         | 0.009                                         | 0.009                                            |
| Bond angles (°)                                    | 1.371                                         | 1.421                                         | 1.415                                            |
| Validation                                         |                                               |                                               |                                                  |
| MolProbity score                                   | 1.65                                          | 1.30                                          | 1.60                                             |
| Clashscore                                         | 6.92                                          | 4.49                                          | 6.70                                             |
| Poor rotamers (%)                                  | 0.45                                          | 0.91                                          | 0.90                                             |
| Ramachandran plot                                  |                                               |                                               |                                                  |
| Favored (%)                                        | 96.05                                         | 97.67                                         | 96.44                                            |
| Allowed (%)                                        | 3.95                                          | 2.33                                          | 3.56                                             |
| Disallowed (%)                                     | 0                                             | 0                                             | 0                                                |
